# Supplementary material for: Patient engagement in patient-centered outcomes research: challenges, facilitators and actions to strengthen the field
Source: Atypon-hosted journal article supplement (doi:10.2217/cer-2016-0075), 2017-06-01
Supplement: suppl_appendix.docx [file suppl_appendix.docx]

APPENDIX A: INTERVIEW GUIDE FOR RESEARCHERS

**Background information on patient engagement**

- Please tell me about your project and the patient engagement component.
- What types of patient engagement activities have been done?
- How many engagement activities have been conducted?
- How many patients have participated?
- Does your patient engagement build on existing relationships you have with any patients or patient groups? If so, tell me more about that.
- Are you engaging any non-patient stakeholders? If so, are they participating in the same or separate activities as the patient stakeholders?

**Experience engaging patients**

- How has the patient engagement component of your project been going?
- Tell me about the things that have facilitated patient engagement in your project?
  - Why do you think this has worked well/helped? *(probe on each factor/strategy)*
- Tell be about the things that have hindered or challenged your patient engagement?
  - Why do you think this has not worked well? *(probe on each challenge)*
  - Have you found any ways to address this challenges? *(probe on each challenge)*
  - How successful have this solution been? *(probe on each strategy)*

**Effects of patient engagement**

- Please tell me how involving patients in your project has affected the research project.
- What have you, as a researcher, gotten out of patient engagement?
- Are you doing anything to evaluate patient engagement in your project? If so, please tell me more about that.

**Expectations and goals**

- Why did you decide to engage patients as part of your project?
- What was the purpose of engaging patients as part of your research? What were the specific goals?
- Up to this point in your research, do you feel that the purpose and goals of engagement are being achieved? Why or why not?
- What, if anything, went differently than you planned?
- If you had the opportunity to design a new engagement plan, knowing what you know now, what changes, if any, would you make to your plan? For what reasons would you make each of these changes?

APPENDIX B: INTERVIEW GUIDE FOR PATIENTS

**Background information on patient engagement**

- Please tell me about the ways people have been involved in [researcher]’s study.
- How have you been involved?
- Why did you decide to get involved?
- How did you end up getting involved?
- Did you know [researcher] or anyone from the research team before being involved?

**Experience being engaged**

- Please tell me about your role on the project.
- What activities you have been involved in?
- How is your involvement in the project going?
- What do you like best about being involved?
- What has been the worst part about being involved?
- What are things that [researcher] does that make your involvement work well?
  - Why do you think this has made your involvement go well? *(probe on each factor/strategy)*
- What are things that [researcher] does that make it not work well?
  - Why do you think this has not made your involvement go well? *(probe on each factor/strategy)*
- What has been challenging about being involved in the project?
  - Why has this been challenging? *(probe on each challenge)*
  - What strategies, if any, have been used to address this challenge? *(probe on each challenge)*

**Effects of patient engagement**

- How do you think your involvement in the project has affected the project?
- What, if anything, have you gotten out of being involved?

**Expectations and goals**

- What were you expecting about being involved in the project? Have your expectations been met?
- What do you think were the specific goals [researcher] had for involving people?
- Up to this point in the project, do you feel that that the goals are being achieved? Why or why not?
